# Supplementary material for: Effect of chemical structure of S-nitrosothiols on nitric oxide release mediated by the copper sites of a metal organic framework based environment
Source: Royal Society of Chemistry journal article supplement (doi:10.1039/c7cp01704a), 2017-01-01
Supplement: c7cp01704a1.pdf [file c7cp01704a1.pdf]

## Supporting Information

### Effect of chemical structure of S-nitrosothiols on nitric oxide release mediated by the copper sites of a metal organic framework based environment

Kiara Taylor-Edinbyrd, Tanping Li and Revati Kumar\*

Department of Chemistry, Louisiana State University, Baton Rouge, LA 70803, USA

Corresponding authors: Revati Kumar ([revatik@lsu.edu](mailto:revatik@lsu.edu))

#### Partial charges

**S1.** The representative monomer clusters along with the partial charges (electron/elementary charge) for CH<sub>3</sub>SNO, CysNO, SNAC, SNAP, GSNO and ethanol. Atomic representation is as follows: carbon (cyan), oxygen (red), hydrogen (white), sulfur (yellow) and nitrogen (dark blue).

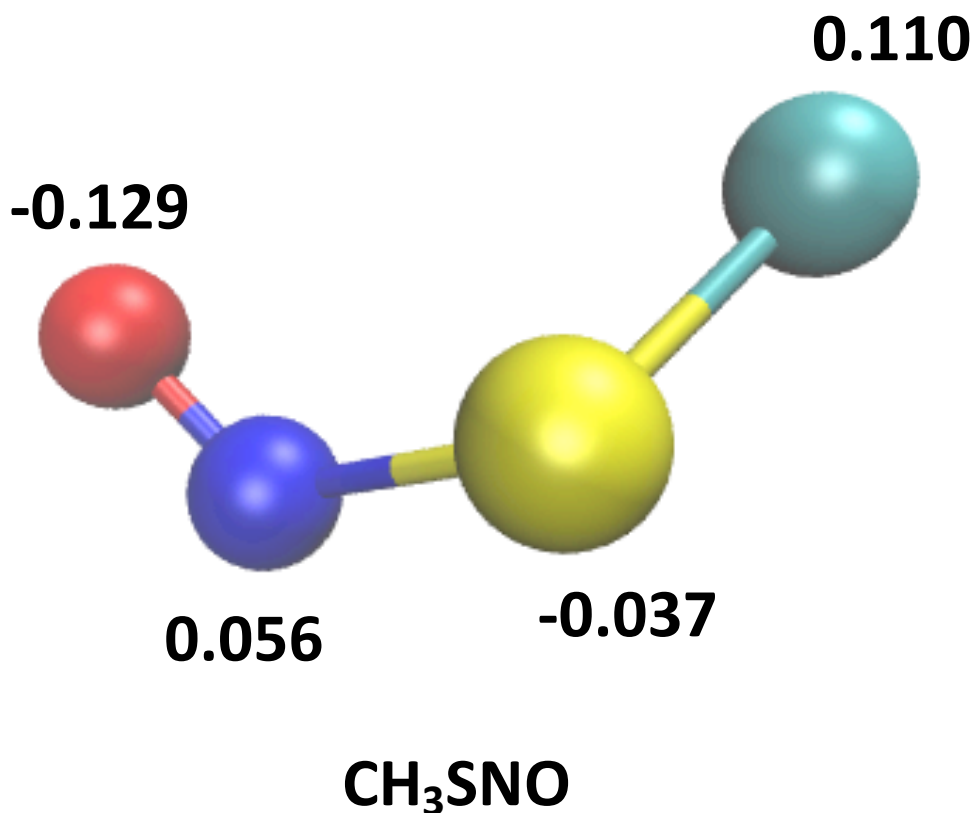

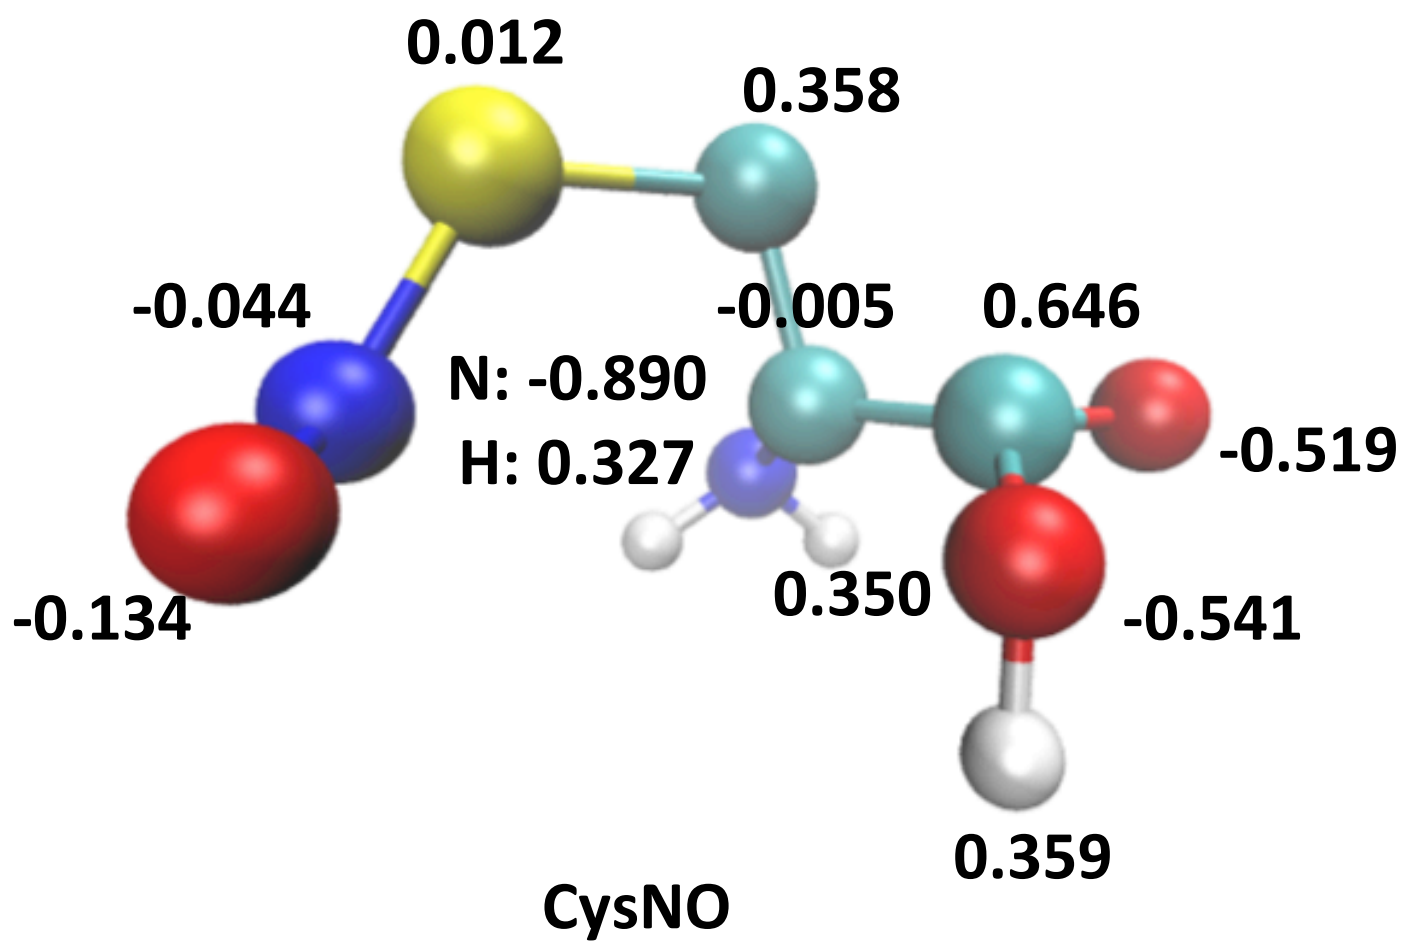

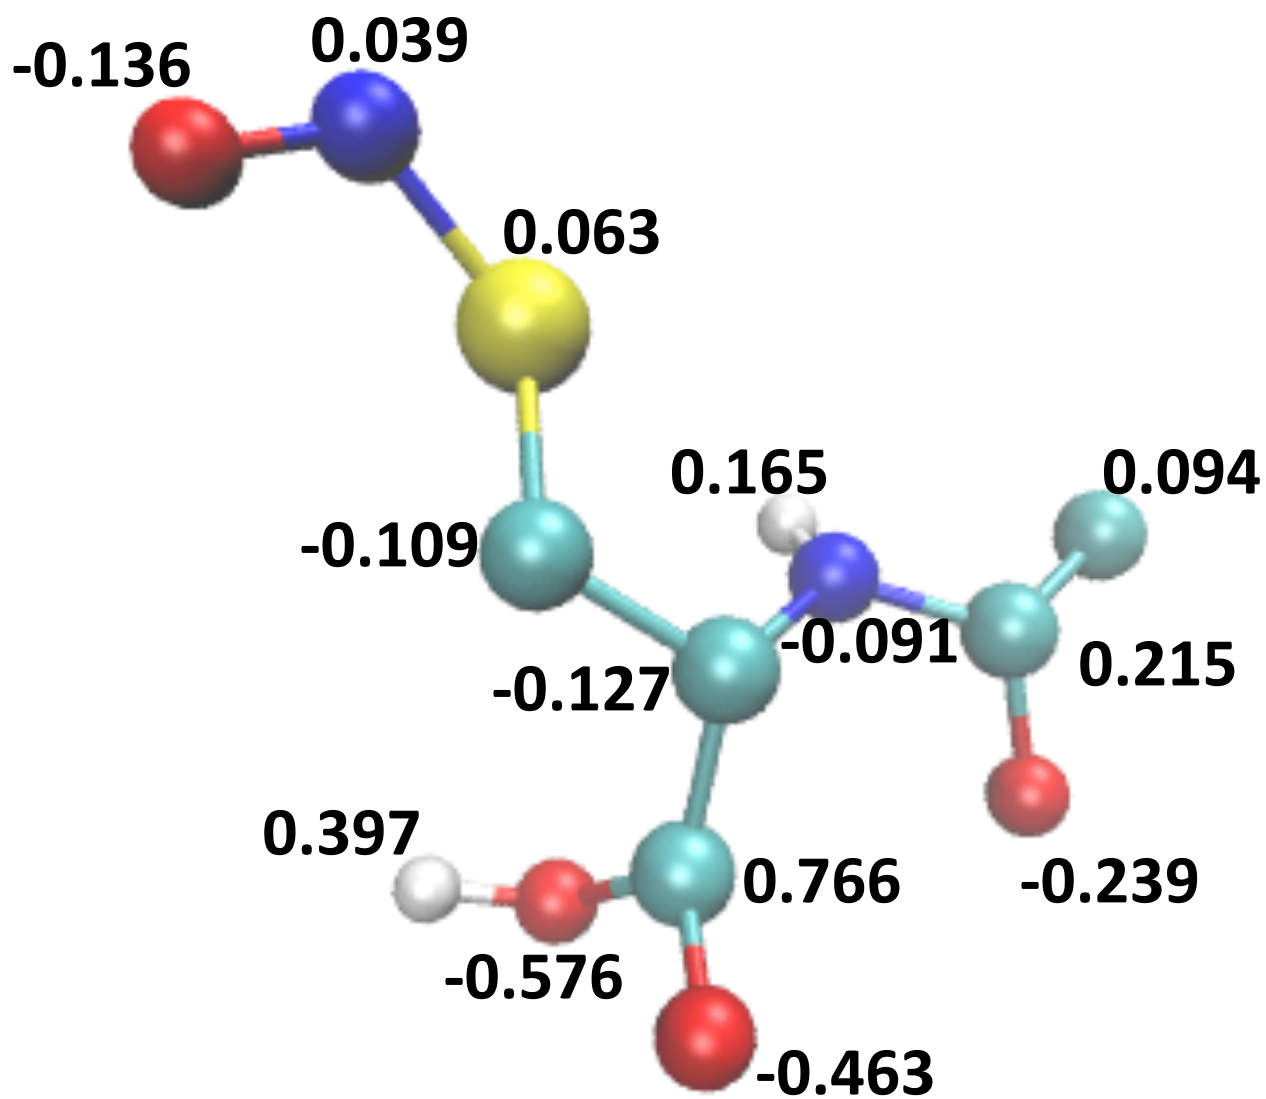

**SNAC**

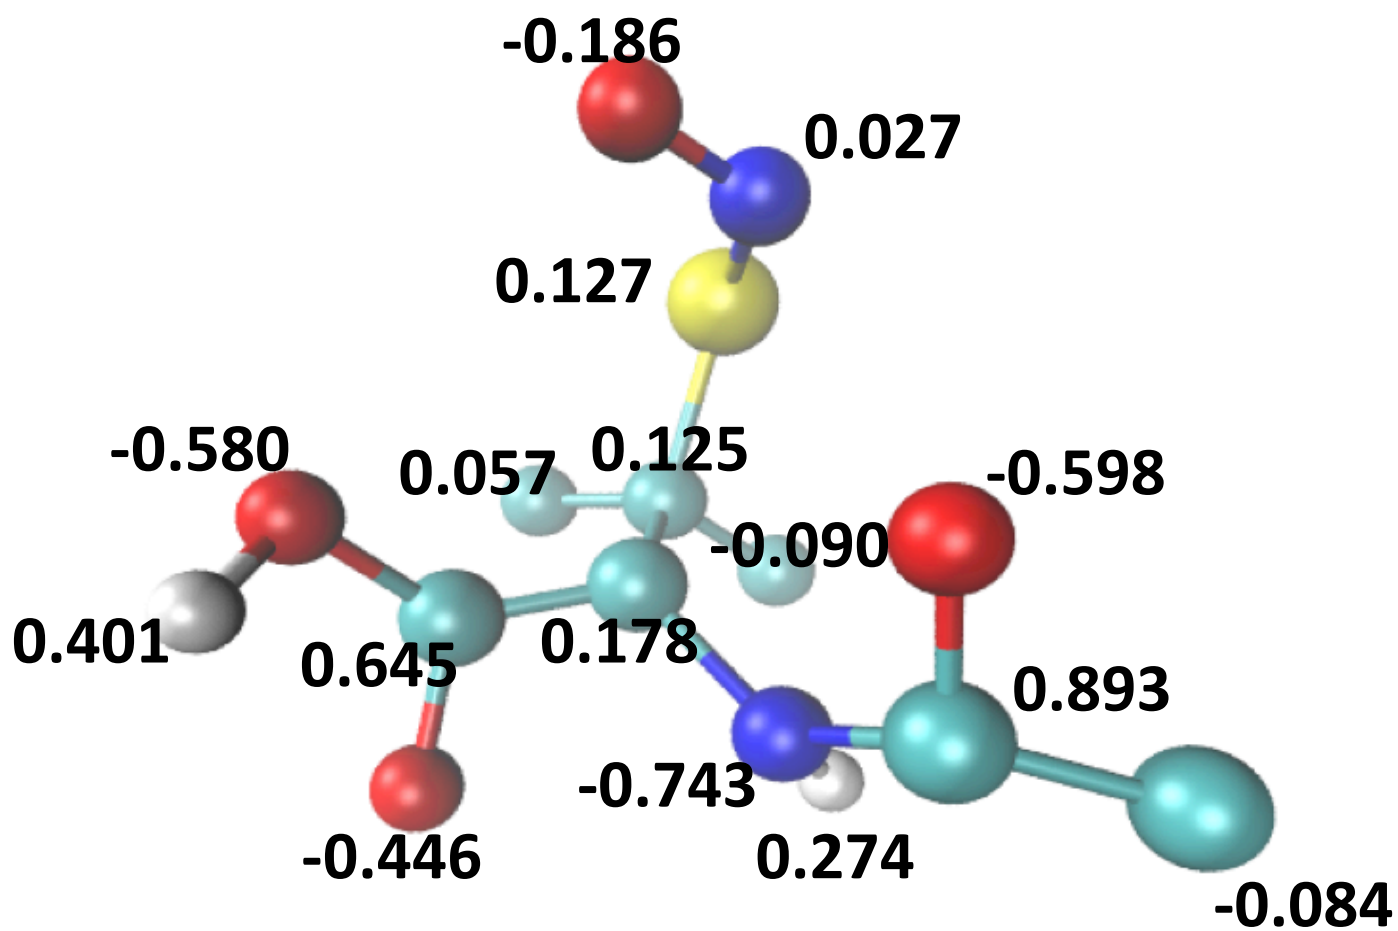

**SNAP**

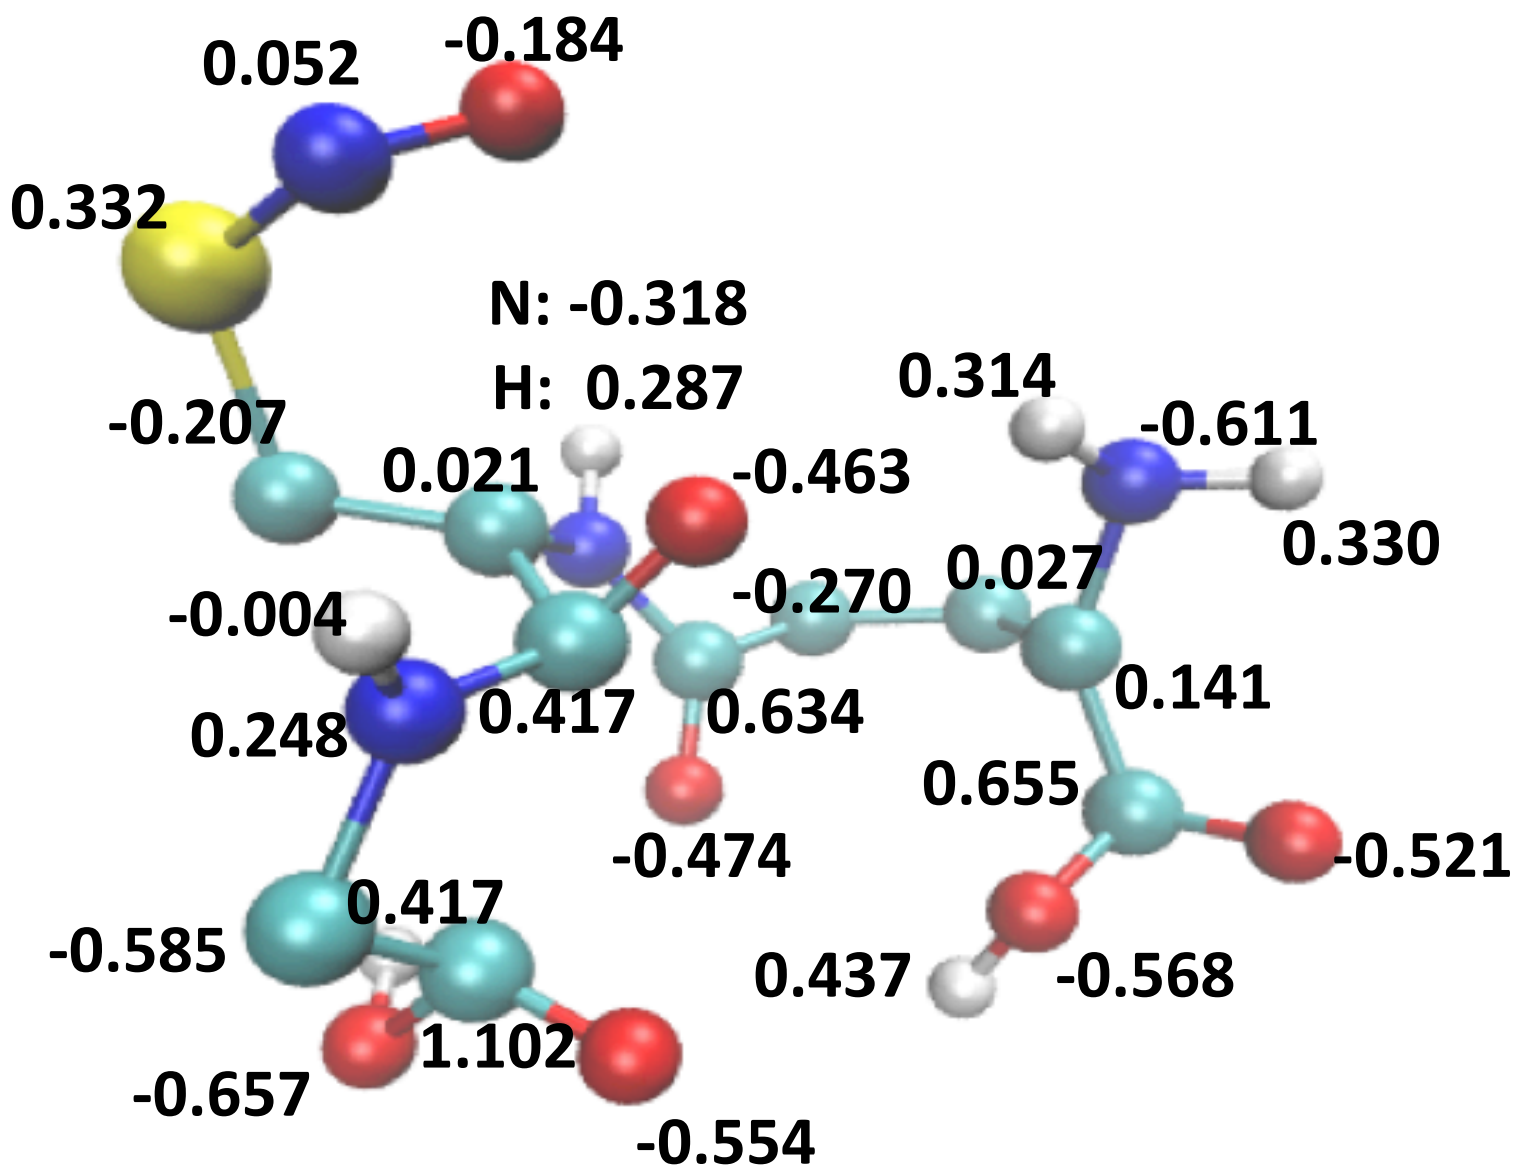

**GSNO**

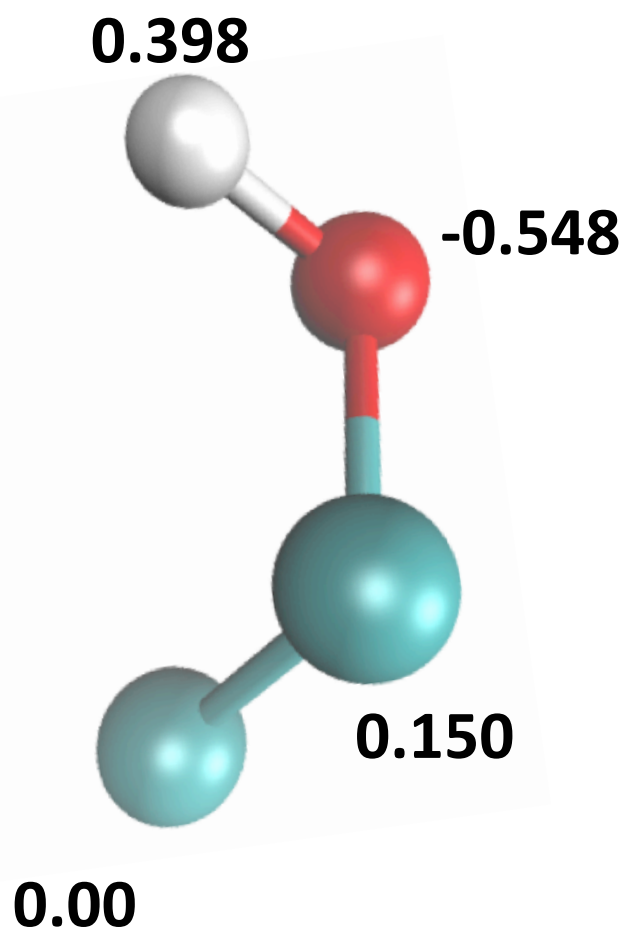

**Ethanol**
